# Supplementary material for: Photosensitizing porphyrin–triazine compound for bulk heterojunction solar cells
Source: Royal Society of Chemistry journal article supplement (doi:10.1039/c2jm33840h), 2012-01-01
Supplement: c2jm33840h.pdf [file c2jm33840h.pdf]

Supporting Information for:

**Photosensitizing Porphyrin-triazine Compound for Bulk Heterojunction Solar Cells**

Aritat Luechai, Jacek Gasiorowski, Amorn Petsom, Helmut Neugebauer, Niyazi Serdar Sariciftci, and Patchanita Thamyongkit\*

**Table of Contents**

|                                      |       |
|--------------------------------------|-------|
| Characterization data of <b>Zn-2</b> | S2–S5 |
| Absorption spectrum of a P3HT film   | S6    |

---

\* Corresponding author. Tel.: +662-218-7587. Fax: +662-254-1309. E-mail: patchanita.v@chula.ac.th

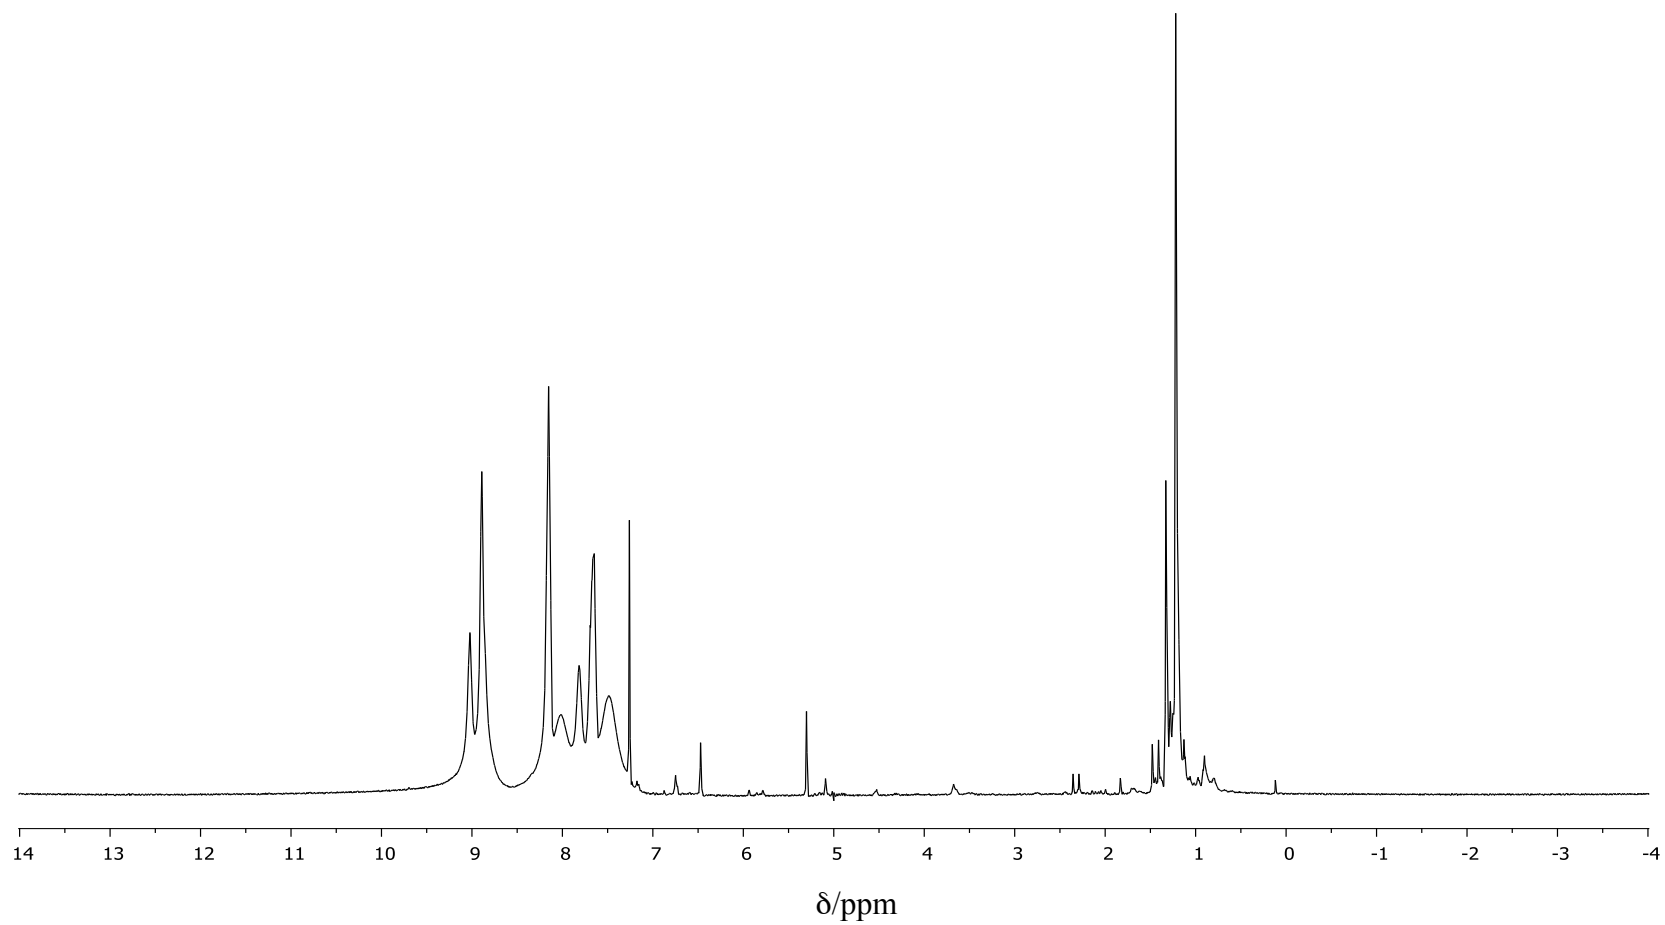

$^1\text{H-NMR}$  spectrum of **Zn-2** in  $\text{CDCl}_3$

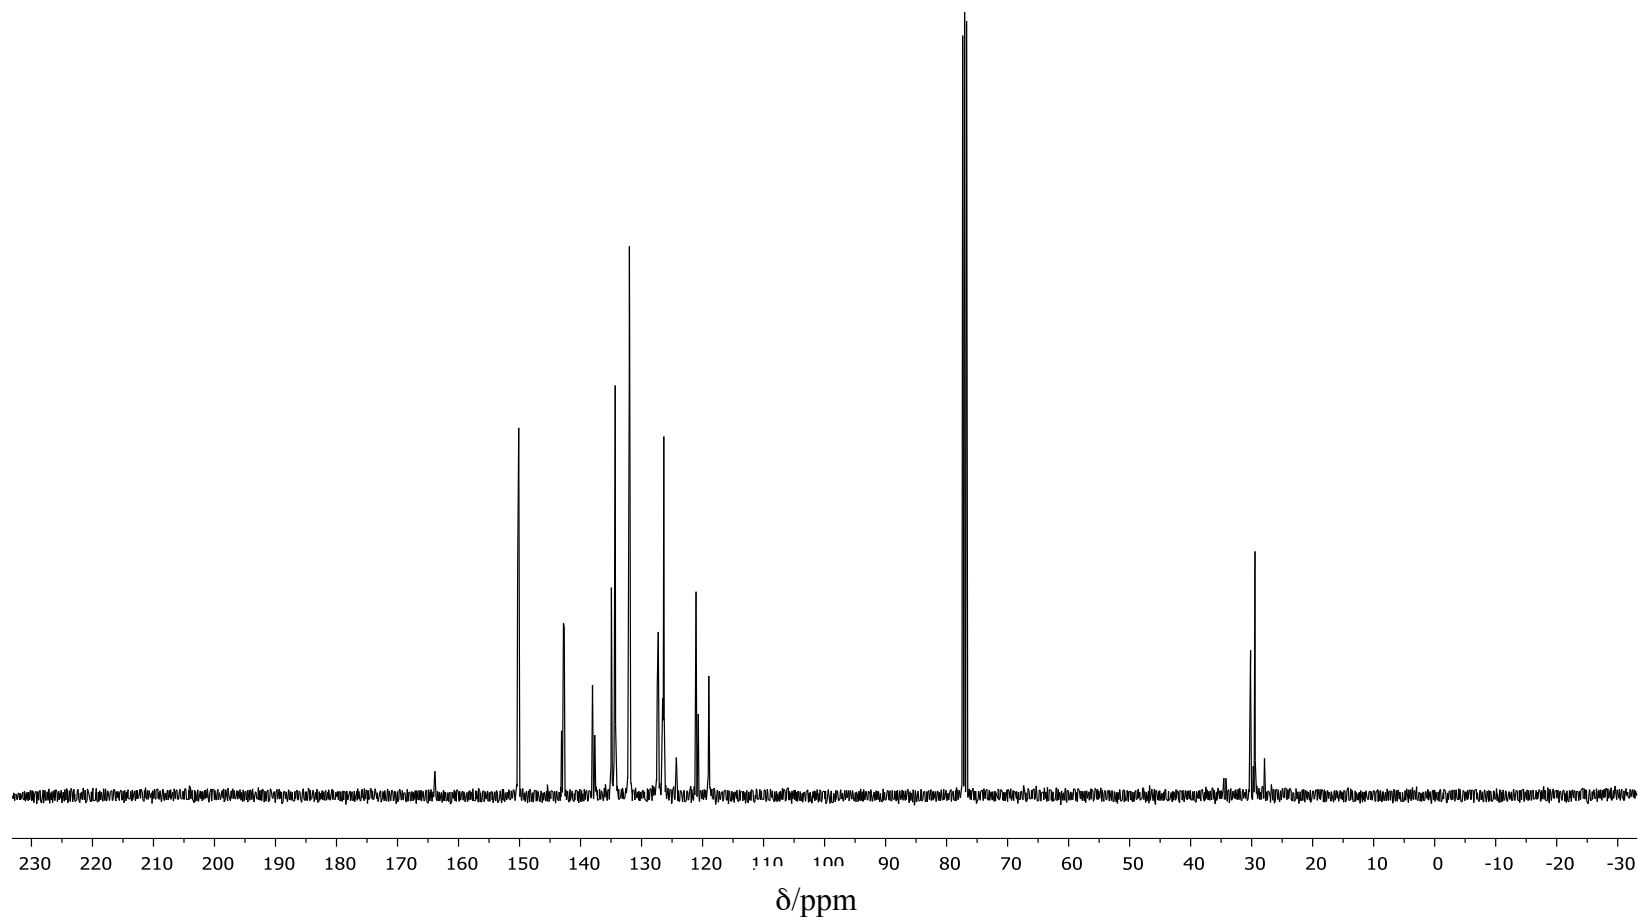

$^{13}\text{C}$ -NMR spectrum of **Zn-2** in  $\text{CDCl}_3$ .

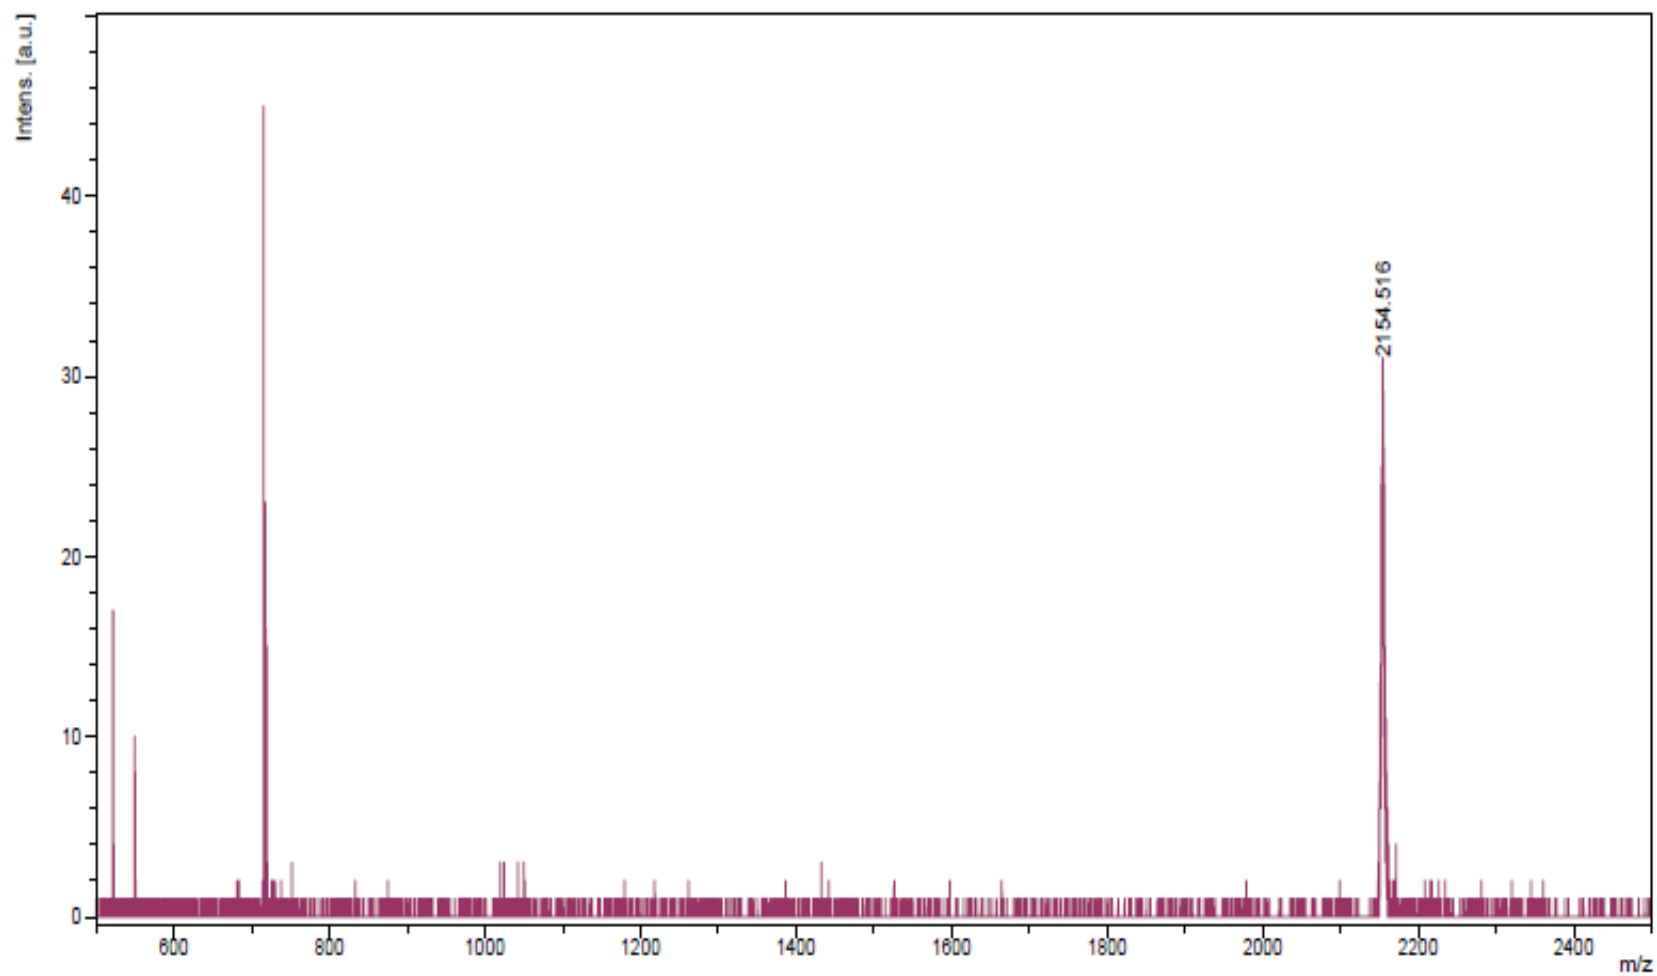

MALDI-TOF mass spectrum of **Zn-2**.

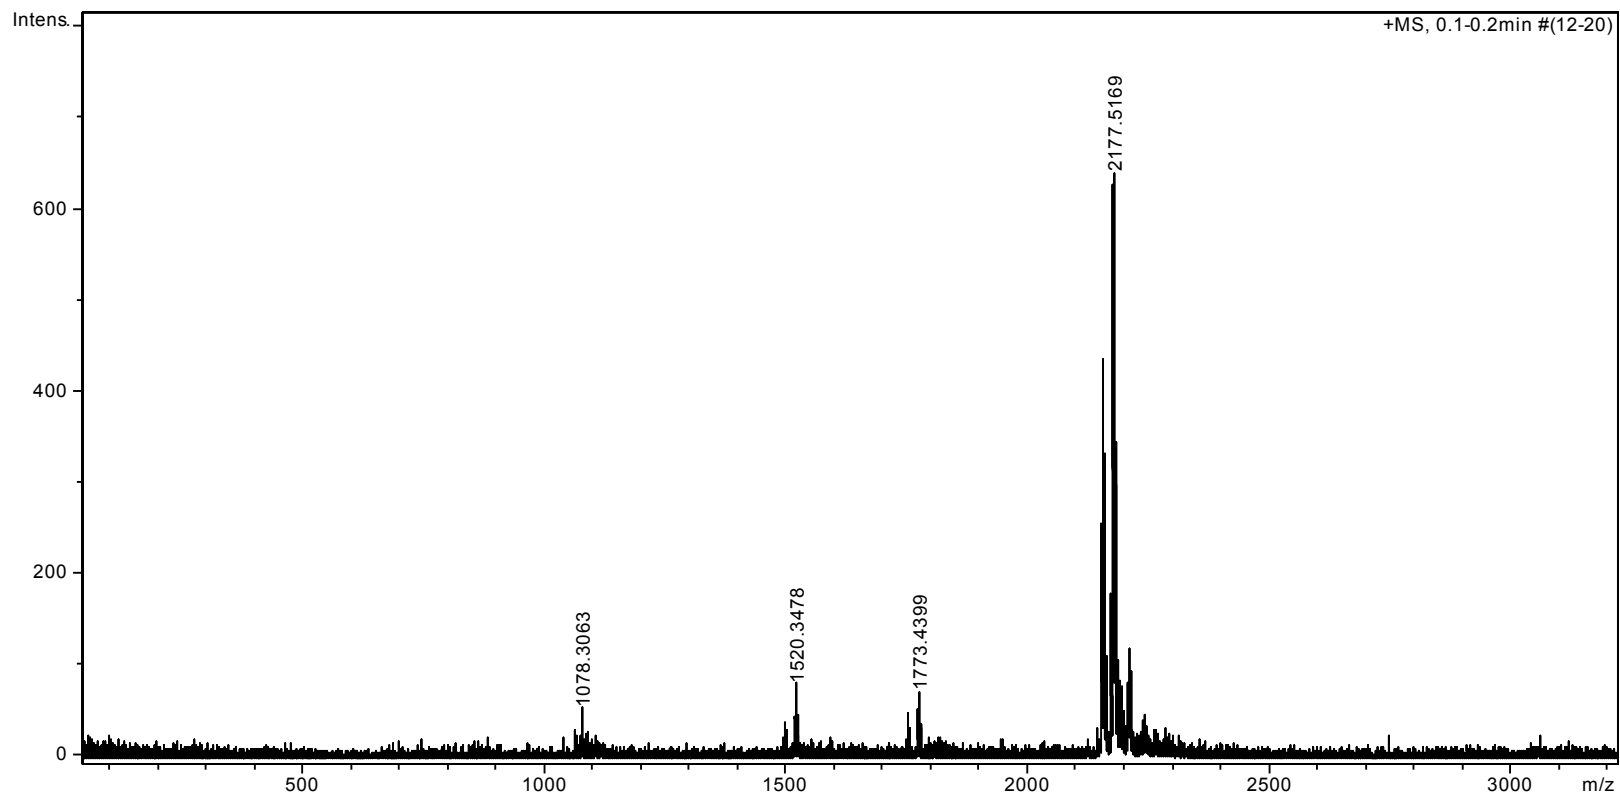

ESI-HRMS spectrum of **Zn-1**

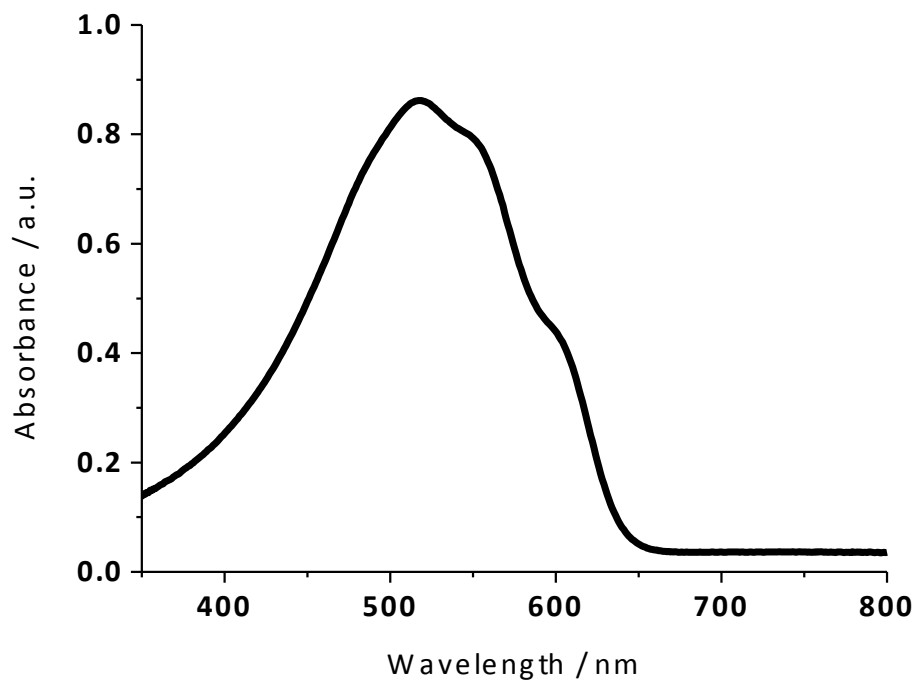

Absorption spectrum of a P3HT film
